# Supplementary material
Source: Springer Nature journal article supplement (https://www.springermedizin.de/resource/supplementary/12905_2012_311_MOESM1_ESM.pdf/9518374)
Supplement: MOESM1 [file 9518374]

## Appendix: Tables

Model (M1): Evaluation of blood loss

Let

|               |                                                                                                                     |
|---------------|---------------------------------------------------------------------------------------------------------------------|
| $Hb_{ik}$     | Hemoglobin [g/dl] of patient $i$ at day $k$ (imputed by linear interpolation)                                       |
| $Fe_{ik}$     | Serum-ferritin [ng/ml] of patient $i$ at day $k$ , (imputed by linear interpolation)                                |
| $H_{ik}$      | Number of days with HEAVY bleeding during the episode of interest of patient $i$ with respect to day $k$            |
| $H_{ik}^1$    | Number of days with HEAVY bleeding during the preceding episode of patient $i$ with respect to day $k$              |
| $H_i^I$       | Occurrence [0=no, 1=yes] of HEAVY bleeding during the complete available diary of patient $i$                       |
| $N_{ik}^{MW}$ | Mean number of days with NORMAL bleeding of all episodes of the last 30 days of patient $i$ with respect to day $k$ |
| $N_i^{BI}$    | Number of days with NORMAL bleeding during the second heaviest episode during baseline of patient $i$               |
| $N_{ik}^I$    | Occurrence of NORMAL bleeding during the episode of interest of patient $i$ with respect to day $k$                 |
| $L_i^{BI}$    | Number of days with LIGHT bleeding during the second heaviest episode during baseline of patient $i$                |
| $L_{ik}^I$    | Occurrence of LIGHT bleeding during the episode of interest of patient $i$ with respect to day $k$                  |
| $S_{ik}^I$    | Occurrence of SPOTTING during the episode of interest of patient $i$ with respect to day $k$                        |
| $Age_i$       | Age of patient $i$ [years],                                                                                         |

then we get the following equations for the estimation of the MBLV according (M1) based on the BI given in the diary of patient  $i$  at day  $k$

|                                                                                                                                                                                                                                                                                                                        |                                                                                                                                                                                                                                                                                                                       |
|------------------------------------------------------------------------------------------------------------------------------------------------------------------------------------------------------------------------------------------------------------------------------------------------------------------------|-----------------------------------------------------------------------------------------------------------------------------------------------------------------------------------------------------------------------------------------------------------------------------------------------------------------------|
| if day $k$ was a day with SPOTTING                                                                                                                                                                                                                                                                                     | if day $k$ was a day with LIGHT bleeding                                                                                                                                                                                                                                                                              |
| $  \begin{aligned}  MBLV_{Spotting\ ik} &= \exp (2.5712 \\  &-0.1008 Hb_{ik} + 0.002255 Fe_{ik} \\  &+ 0.0236 H_{ik} - 0.02189 H_{ik}^{-1} + 0.0863 H_i^I \\  &+ 0.01507 N_{ik}^{MW} - 0.04875 N_i^{Bl} \\  &- 0.04017 L_i^{Bl} - 0.02261 L_{ik}^I \\  &- 0.02386 S_{ik}^I \\  &+ 0.00535 Age_i) - 1  \end{aligned}  $ | $  \begin{aligned}  MBLV_{light\ ik} &= \exp (3.19185 \\  &-0.1008 Hb_{ik} - 0.002133 Fe_{ik} \\  &+ 0.01273 H_{ik} - 0.02221 H_{ik}^{-1} - 0.2687 H_i^I \\  &+ 0.01507 N_{ik}^{MW} - 0.04875 N_i^{Bl} \\  &- 0.04017 L_i^{Bl} + 0.05601 L_{ik}^I \\  &+ 0.10104 S_{ik}^I \\  &+ 0.01387 Age_i) - 1  \end{aligned}  $ |
| if day $k$ was a day with NORMAL bleeding                                                                                                                                                                                                                                                                              | if day $k$ was a day with HEAVY bleeding                                                                                                                                                                                                                                                                              |
| $  \begin{aligned}  MBLV_{normal\ ik} &= \exp (4.16355 \\  &-0.1008 Hb_{ik} - 0.00327 Fe_{ik} \\  &- 0.03281 H_{ik} + 0.03253 H_{ik}^{-1} - 0.4811 H_i^I \\  &+ 0.01507 N_{ik}^{MW} - 0.04875 N_i^{Bl} \\  &- 0.04017 L_i^{Bl} + 0.14008 L_{ik}^I \\  &+ 0.02943 S_{ik}^I \\  &+ 0.02837 Age_i) - 1  \end{aligned}  $  | $  \begin{aligned}  MBLV_{heavy\ ik} &= \exp (5.01735 \\  &-0.1008 Hb_{ik} - 0.00437 Fe_{ik} \\  &- 0.05434 H_{ik} + 0.04494 H_{ik}^{-1} - 0.4811 H_i^I \\  &+ 0.01507 N_{ik}^{MW} - 0.04875 N_i^{Bl} \\  &- 0.04017 L_i^{Bl} + 0.05601 L_{ik}^I \\  &- 0.02386 S_{ik}^I \\  &+ 0.03026 Age_i) - 1  \end{aligned}  $  |

**Table 1 Detailed description of model (M1)**

| <b>Model (M1)</b>  |          |          |                |          |          |
|--------------------|----------|----------|----------------|----------|----------|
| Fixed Effects      | BI       | Estimate | Standard Error | LCL      | UCL      |
| Intercept          |          | 4.6027   | 0.2535         | 4.1055   | 5.0999   |
| BI                 | Spotting | -2.4673  | 0.2738         | -3.0044  | -1.9302  |
| BI                 | light    | -1.9143  | 0.2138         | -2.3336  | -1.4950  |
| BI                 | normal   | -0.9745  | 0.1552         | -1.2790  | -0.6701  |
| BI                 | heavy    | 0        | .              | .        | .        |
| $H_{ik}$           |          | -0.1008  | 0.01042        | -0.1212  | -0.08034 |
| $Fe_{ik}$          |          | -0.00437 | 0.001062       | -0.00645 | -0.00229 |
| $Fe_{ik} * BI$     | Spotting | 0.006625 | 0.001694       | 0.003305 | 0.009946 |
| $Fe_{ik} * BI$     | light    | 0.002237 | 0.001273       | -0.00026 | 0.004733 |
| $Fe_{ik} * BI$     | normal   | -0.00110 | 0.000973       | -0.00301 | 0.000804 |
| $Fe_{ik} * BI$     | heavy    | 0        | .              | .        | .        |
| $H_{ik}$           |          | -0.05434 | 0.01261        | -0.07906 | -0.02962 |
| $H_{ik} * BI$      | Spotting | 0.07794  | 0.02101        | 0.03675  | 0.1191   |
| $H_{ik} * BI$      | light    | 0.06707  | 0.01720        | 0.03336  | 0.1008   |
| $H_{ik} * BI$      | normal   | -0.02153 | 0.01771        | -0.05623 | 0.01318  |
| $H_{ik} * BI$      | heavy    | 0        | .              | .        | .        |
| $H_{ik}^{-1}$      |          | 0.04494  | 0.01221        | 0.02102  | 0.06887  |
| $H_{ik}^{-1} * BI$ | Spotting | -0.06683 | 0.02065        | -0.1073  | -0.02635 |
| $H_{ik}^{-1} * BI$ | light    | -0.06715 | 0.01743        | -0.1013  | -0.03297 |
| $H_{ik}^{-1} * BI$ | normal   | 0.01241  | 0.01756        | -0.02200 | 0.04682  |
| $H_{ik}^{-1} * BI$ | heavy    | 0        | .              | .        | .        |
| $H_i^I$            |          | -0.4811  | 0.09601        | -0.6693  | -0.2929  |
| $H_i^I * BI$       | Spotting | 0.5674   | 0.1202         | 0.3317   | 0.8031   |
| $H_i^I * BI$       | light    | 0.2124   | 0.08462        | 0.04656  | 0.3783   |
| $H_i^I * BI$       | normal   | 0        | .              | .        | .        |
| $H_i^I * BI$       | heavy    | 0        | .              | .        | .        |
| $N_{ik}^{MW}$      |          | 0.01507  | 0.004575       | 0.006104 | 0.02404  |
| $N_i^{BI}$         |          | -0.04875 | 0.01562        | -0.07936 | -0.01814 |
| $L_i^{BI}$         |          | -0.04017 | 0.009837       | -0.05945 | -0.02089 |
| $L_{ik}^I$         |          | 0.05601  | 0.04037        | -0.02311 | 0.1351   |
| $L_{ik}^I * BI$    | Spotting | -0.07862 | 0.05267        | -0.1819  | 0.02462  |
| $L_{ik}^I * BI$    | light    | 0        | .              | .        | .        |
| $L_{ik}^I * BI$    | normal   | 0.08407  | 0.05242        | -0.01867 | 0.1868   |
| $L_{ik}^I * BI$    | heavy    | 0        | .              | .        | .        |
| $S_{ik}^I$         |          | -0.02386 | 0.03135        | -0.08532 | 0.03759  |
| $S_{ik}^I * BI$    | Spotting | 0        | .              | .        | .        |

| <b>Model (M1)</b> |          |          |                |          |          |
|-------------------|----------|----------|----------------|----------|----------|
| Fixed Effects     | BI       | Estimate | Standard Error | LCL      | UCL      |
| $S_{ik}^I * BI$   | light    | 0.1249   | 0.03947        | 0.04751  | 0.2022   |
| $S_{ik}^I * BI$   | normal   | 0.05329  | 0.03915        | -0.02346 | 0.1300   |
| $S_{ik}^I * BI$   | heavy    | 0        | .              | .        | .        |
| $Age_i$           |          | 0.03026  | 0.004714       | 0.02102  | 0.03950  |
| $Age_i * BI$      | Spotting | -0.02491 | 0.006427       | -0.03751 | -0.01231 |
| $Age_i * BI$      | light    | -0.01639 | 0.005060       | -0.02630 | -0.00647 |
| $Age_i * BI$      | normal   | -0.00189 | 0.003664       | -0.00908 | 0.005288 |
| $Age_i * BI$      | heavy    | 0        | .              | .        | .        |

**Table 2 Model (M1), fixed effects**

| <b>Model (M1)</b>        | Patient  |                | Residual Error |                |
|--------------------------|----------|----------------|----------------|----------------|
| Random Effects: Variance | Estimate | Standard Error | Estimate       | Standard Error |
| Spotting                 | 0.3238   | 0.03171        | 0.5478         | 0.01310        |
| light                    | 0.2658   | 0.02177        | 0.7411         | 0.01162        |
| normal                   | 0.3002   | 0.02514        | 0.7705         | 0.01437        |
| heavy                    | 0.3561   | 0.03092        | 0.4732         | 0.01240        |

**Table 3 Model (M1), random effects**

| <b>Model (M2)</b> |          |          |                |          |          |
|-------------------|----------|----------|----------------|----------|----------|
| Fixed Effects     | BI       | Estimate | Standard Error | LCL      | UCL      |
| Intercept         |          | 3.9210   | 0.2332         | 3.4637   | 4.3783   |
| BI                | Spotting | -2.0222  | 0.2581         | -2.5283  | -1.5160  |
| BI                | light    | -1.7589  | 0.2021         | -2.1552  | -1.3626  |
| BI                | normal   | -0.9576  | 0.1553         | -1.2621  | -0.6530  |
| BI                | heavy    | 0        | .              | .        | .        |
| $H_{ik}$          |          | -0.1011  | 0.01048        | -0.1217  | -0.08060 |
| $Fe_{ik}$         |          | -0.00452 | 0.001066       | -0.00661 | -0.00243 |
| $Fe_{ik} * BI$    | Spotting | 0.006538 | 0.001699       | 0.003207 | 0.009869 |
| $Fe_{ik} * BI$    | light    | 0.002414 | 0.001273       | -0.00008 | 0.004909 |
| $Fe_{ik} * BI$    | normal   | -0.00098 | 0.000978       | -0.00290 | 0.000937 |
| $Fe_{ik} * BI$    | heavy    | 0        | .              | .        | .        |
| $H_{ik}$          |          | -0.04743 | 0.01243        | -0.07179 | -0.02307 |
| $H_{ik} * BI$     | Spotting | 0.06983  | 0.02028        | 0.03009  | 0.1096   |
| $H_{ik} * BI$     | light    | 0.04835  | 0.01652        | 0.01598  | 0.08073  |
| $H_{ik} * BI$     | normal   | -0.01346 | 0.01682        | -0.04642 | 0.01950  |
| $H_{ik} * BI$     | heavy    | 0        | .              | .        | .        |
| $N_{ik}^I$        |          | 0.03505  | 0.01647        | 0.002759 | 0.06734  |
| $L_{ik}^I$        |          | 0.06246  | 0.04039        | -0.01671 | 0.1416   |
| $L_{ik}^I * BI$   | Spotting | -0.09965 | 0.05286        | -0.2033  | 0.003948 |
| $L_{ik}^I * BI$   | light    | 0        | .              | .        | .        |
| $L_{ik}^I * BI$   | normal   | 0.07293  | 0.05253        | -0.03003 | 0.1759   |
| $L_{ik}^I * BI$   | heavy    | 0        | .              | .        | .        |
| $S_{ik}^I$        |          | -0.02252 | 0.03140        | -0.08407 | 0.03902  |
| $S_{ik}^I * BI$   | Spotting | 0        | .              | .        | .        |
| $S_{ik}^I * BI$   | light    | 0.1278   | 0.03951        | 0.05037  | 0.2052   |
| $S_{ik}^I * BI$   | normal   | 0.04854  | 0.03928        | -0.02844 | 0.1255   |
| $S_{ik}^I * BI$   | heavy    | 0        | .              | .        | .        |
| $Age_i$           |          | 0.03285  | 0.004761       | 0.02352  | 0.04218  |
| $Age_i * BI$      | Spotting | -0.02394 | 0.006447       | -0.03658 | -0.01131 |
| $Age_i * BI$      | light    | -0.01659 | 0.005044       | -0.02648 | -0.00670 |
| $Age_i * BI$      | normal   | -0.00201 | 0.003683       | -0.00923 | 0.005207 |
| $Age_i * BI$      | heavy    | 0        | .              | .        | .        |

**Table 4 Model (M2), fixed effects**

| <b>Model (M2)</b>               | <b>Patient</b>  |                       | <b>Residual Error</b> |                       |
|---------------------------------|-----------------|-----------------------|-----------------------|-----------------------|
| <b>Random Effects: Variance</b> | <b>Estimate</b> | <b>Standard Error</b> | <b>Estimate</b>       | <b>Standard Error</b> |
| Spotting                        | 0.3261          | 0.03189               | 0.5476                | 0.01310               |
| light                           | 0.2897          | 0.02338               | 0.7416                | 0.01163               |
| normal                          | 0.3337          | 0.02730               | 0.7739                | 0.01443               |
| heavy                           | 0.3761          | 0.03278               | 0.4746                | 0.01243               |

**Table 5 Model (M2), random effects**

| <b>Model (M3)</b> |          |          |                |          |          |
|-------------------|----------|----------|----------------|----------|----------|
| Fixed Effects     | BI       | Estimate | Standard Error | LCL      | UCL      |
| Intercept         |          | 5.1672   | 0.1336         | 4.9052   | 5.4291   |
| BI                | Spotting | -2.9475  | 0.05658        | -3.0585  | -2.8365  |
| BI                | light    | -2.2335  | 0.04349        | -2.3188  | -2.1482  |
| BI                | normal   | -0.9132  | 0.03158        | -0.9752  | -0.8513  |
| BI                | heavy    | 0        | .              | .        | .        |
| $Hb_{ik}$         |          | -0.1008  | 0.01055        | -0.1215  | -0.08009 |
| $Fe_{ik}$         |          | -0.00479 | 0.001086       | -0.00691 | -0.00266 |
| $Fe_{ik} * BI$    | Spotting | 0.006537 | 0.001713       | 0.003179 | 0.009895 |
| $Fe_{ik} * BI$    | light    | 0.002459 | 0.001286       | -0.00006 | 0.004979 |
| $Fe_{ik} * BI$    | normal   | -0.00080 | 0.000980       | -0.00272 | 0.001121 |
| $Fe_{ik} * BI$    | heavy    | 0        | .              | .        | .        |

**Table 6 Model (M3), fixed effects**

| <b>Model (M3)</b>        | Patient  |                | Residual Error |                |
|--------------------------|----------|----------------|----------------|----------------|
| Random Effects: Variance | Estimate | Standard Error | Estimate       | Standard Error |
| Spotting                 | 0.3314   | 0.03244        | 0.5484         | 0.01311        |
| light                    | 0.3074   | 0.02453        | 0.7421         | 0.01164        |
| normal                   | 0.3939   | 0.03133        | 0.7762         | 0.01446        |
| heavy                    | 0.4423   | 0.03730        | 0.4771         | 0.01249        |

**Table 7 Model (M3), random effects**

| <b>Model (M4)</b>  |          |          |                |          |          |
|--------------------|----------|----------|----------------|----------|----------|
| Fixed Effects      | BI       | Estimate | Standard Error | LCL      | UCL      |
| Intercept          |          | 4.4280   | 0.1244         | 4.1840   | 4.6721   |
| BI                 | Spotting | -3.2645  | 0.1330         | -3.5253  | -3.0036  |
| BI                 | light    | -2.4975  | 0.09408        | -2.6821  | -2.3130  |
| BI                 | normal   | -1.0739  | 0.06642        | -1.2042  | -0.9437  |
| BI                 | heavy    | 0        | .              | .        | .        |
| $H_{ik}$           |          | -0.05295 | 0.01258        | -0.07760 | -0.02829 |
| $H_{ik} * BI$      | Spotting | 0.08038  | 0.02096        | 0.03929  | 0.1215   |
| $H_{ik} * BI$      | light    | 0.07200  | 0.01719        | 0.03830  | 0.1057   |
| $H_{ik} * BI$      | normal   | -0.02199 | 0.01771        | -0.05671 | 0.01273  |
| $H_{ik} * BI$      | heavy    | 0        | .              | .        | .        |
| $H_{ik}^{-1}$      |          | 0.04963  | 0.01225        | 0.02561  | 0.07365  |
| $H_{ik}^{-1} * BI$ | Spotting | -0.06633 | 0.02067        | -0.1068  | -0.02582 |
| $H_{ik}^{-1} * BI$ | light    | -0.06457 | 0.01747        | -0.09882 | -0.03033 |
| $H_{ik}^{-1} * BI$ | normal   | 0.01485  | 0.01764        | -0.01972 | 0.04943  |
| $H_{ik}^{-1} * BI$ | heavy    | 0        | .              | .        | .        |
| $H_i^I$            |          | -0.4375  | 0.1074         | -0.6480  | -0.2270  |
| $H_i^I * BI$       | Spotting | 0.5229   | 0.1269         | 0.2742   | 0.7717   |
| $H_i^I * BI$       | light    | 0.1898   | 0.08808        | 0.01713  | 0.3624   |
| $H_i^I * BI$       | normal   | 0        | .              | .        | .        |
| $H_i^I * BI$       | heavy    | 0        | .              | .        | .        |
| $N_{ik}^{MW}$      |          | 0.01856  | 0.004583       | 0.009574 | 0.02754  |
| $N_i^{BI}$         |          | -0.05796 | 0.01714        | -0.09156 | -0.02435 |
| $L_i^{BI}$         |          | -0.04800 | 0.01089        | -0.06934 | -0.02666 |
| $L_{ik}^I$         |          | 0.05539  | 0.04050        | -0.02400 | 0.1348   |
| $L_{ik}^I * BI$    | Spotting | -0.07872 | 0.05275        | -0.1821  | 0.02466  |
| $L_{ik}^I * BI$    | light    | 0        | .              | .        | .        |
| $L_{ik}^I * BI$    | normal   | 0.07913  | 0.05259        | -0.02394 | 0.1822   |
| $L_{ik}^I * BI$    | heavy    | 0        | .              | .        | .        |
| $S_{ik}^I$         |          | -0.02250 | 0.03148        | -0.08421 | 0.03921  |
| $S_{ik}^I * BI$    | Spotting | 0        | .              | .        | .        |
| $S_{ik}^I * BI$    | light    | 0.1290   | 0.03957        | 0.05147  | 0.2066   |
| $S_{ik}^I * BI$    | normal   | 0.05629  | 0.03932        | -0.02078 | 0.1334   |
| $S_{ik}^I * BI$    | heavy    | 0        | .              | .        | .        |

**Table 8 Model (M4), fixed effects**



| <b>Model (M4)</b>        | Patient  |                | Residual Error |                |
|--------------------------|----------|----------------|----------------|----------------|
| Random Effects: Variance | Estimate | Standard Error | Estimate       | Standard Error |
| Spotting                 | 0.3623   | 0.03455        | 0.5458         | 0.01303        |
| light                    | 0.3136   | 0.02489        | 0.7437         | 0.01166        |
| normal                   | 0.3983   | 0.03193        | 0.7727         | 0.01441        |
| heavy                    | 0.4545   | 0.03809        | 0.4747         | 0.01244        |

**Table 9 Model (M4), random effects**

| <b>Model (M5)</b>    |          |          |                |          |          |
|----------------------|----------|----------|----------------|----------|----------|
| Fixed Effects        | BI       | Estimate | Standard Error | LCL      | UCL      |
| Intercept            |          | 2.5439   | 0.1977         | 2.1561   | 2.9317   |
| BI                   | Spotting | -1.8872  | 0.2594         | -2.3959  | -1.3785  |
| BI                   | light    | -1.5478  | 0.2019         | -1.9438  | -1.1517  |
| BI                   | normal   | -0.8546  | 0.1457         | -1.1403  | -0.5689  |
| BI                   | heavy    | 0        | .              | .        | .        |
| Age <sub>i</sub>     |          | 0.03411  | 0.005078       | 0.02416  | 0.04406  |
| Age <sub>i</sub> *BI | Spotting | -0.02476 | 0.006677       | -0.03785 | -0.01167 |
| Age <sub>i</sub> *BI | light    | -0.01702 | 0.005185       | -0.02718 | -0.00686 |
| Age <sub>i</sub> *BI | normal   | -0.00203 | 0.003729       | -0.00934 | 0.005280 |
| Age <sub>i</sub> *BI | heavy    | 0        | .              | .        | .        |

**Table 10 Model (M5), fixed effects**

| <b>Model (M5)</b>        | Patient  |                | Residual Error |                |
|--------------------------|----------|----------------|----------------|----------------|
| Random Effects: Variance | Estimate | Standard Error | Estimate       | Standard Error |
| Spotting                 | 0.3592   | 0.03418        | 0.5465         | 0.01306        |
| light                    | 0.3335   | 0.02618        | 0.7448         | 0.01168        |
| normal                   | 0.4059   | 0.03203        | 0.7794         | 0.01453        |
| heavy                    | 0.4431   | 0.03755        | 0.4789         | 0.01255        |

**Table 11 Model (M5), random effects**
